# Supplementary material for: Machine Learning Methods for Automatic Segmentation of Images of Field- and Glasshouse-Based Plants for High-Throughput Phenotyping
Source: MDPI journal article supplement (doi:10.3390/plants12102035), 2023-05-19
Supplement: s1 [file s1]

## SUPPLEMENTARY DATA

Table S1. Training, validation, and testing data the classification models

| Features               | Total Pixels | Training Data (pixels) | Validation Data (pixels) | Testing Data (pixels) |
|------------------------|--------------|------------------------|--------------------------|-----------------------|
| All Features (AF)      | 24,000,000   | 14,000,000             | 4,800,000                | 4,800,000             |
| Selected Features (SF) | 12,000,000   | 7,200,000              | 2,400,000                | 2,400,000             |

Table S2. Training, validation, and testing data for the different machine learning models

| Test Dataset | Model | Processing time (s) |         |
|--------------|-------|---------------------|---------|
|              |       | AF                  | SF      |
| 10           | MLP   | 5.150               | 2.450   |
|              | SVM   | 132.158             | 86.163  |
|              | RF    | 81.225              | 44.581  |
| 15           | MLP   | 9.443               | 2.931   |
|              | SVM   | 187.055             | 105.434 |
|              | RF    | 156.355             | 58.145  |
| 30           | MLP   | 17.220              | 6.052   |
|              | SVM   | 277.474             | 155.181 |
|              | RF    | 188.553             | 98.336  |
